# Supplementary material for: MK5 activates Rag transcription via Foxo1 in developing B cells
Source: PubMed Central journal article supplement — J Exp Med. 2013 Jul 29;210(8):1621–34. doi: 10.1084/jem.20130498 (PMC3727319; doi:10.1084/jem.20130498), 2013-07-29
Supplement: supp_jem.20130498_JEM_20130498_sm.pdf [file supp_jem.20130498_JEM_20130498_sm.pdf]

SUPPLEMENTAL MATERIAL

Chow et al., <http://www.jem.org/cgi/content/full/jem.20130498/DC1>

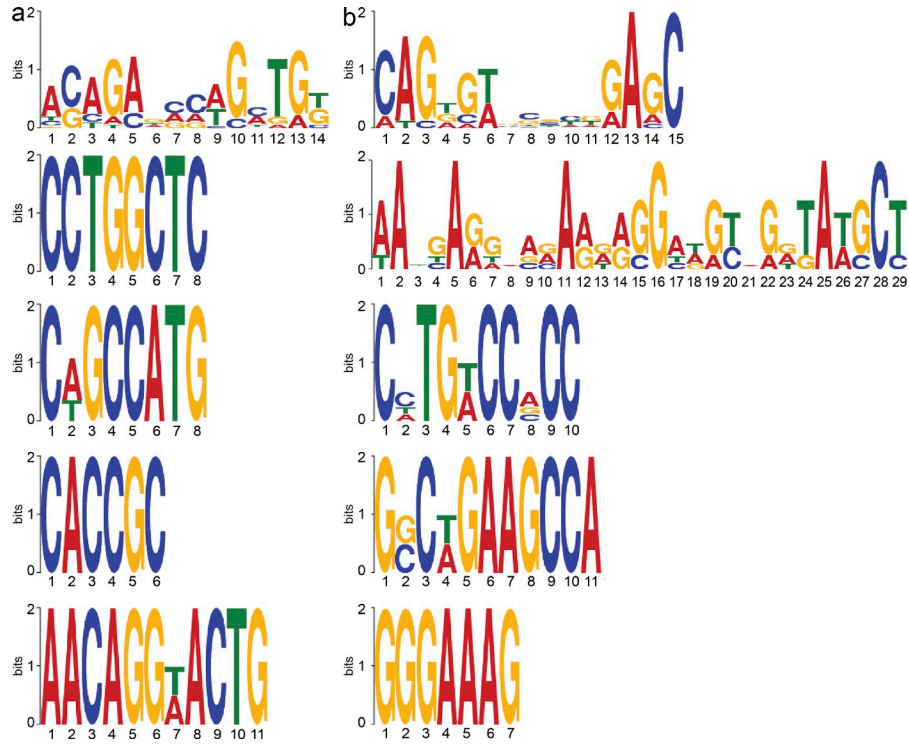

**Figure S1.** Foxo1 binding peaks at S215A-sensitive and -insensitive genes enrich for different motifs. (a) Five most enriched sequences found within Foxo1 binding regions at *Rag* and *Aicda* loci (Foxo1-S215 sensitive). (b) Five most enriched sequences found at Foxo1 binding regions at other Foxo1-dependent but S215-independent loci.

**Table S1.** Foxo1 mutants and primers used for mutagenesis

| Residues      | Primer sequence (5'-3')                                          |
|---------------|------------------------------------------------------------------|
| T24A          | CGGCAGCGCTCCTGTGCTGGCCG                                          |
| S253A         | CGGAGAAGAGCTGCGCCATGGACAACAACA                                   |
| S316A         | TTCGTCTCGAACCAGCGCAAATGCTAGTACCATC                               |
| S215A         | CAATTCGCCACAATCTGGCCCTCACAGCAAGTTT                               |
| R248/250K     | CAAGAGCGGAAAATACCCCAAGAGAAAAGCTGCGTCCATGGACAAC                   |
| R311/313K     | CCACAGCAACGATGACTTTGATAACTGGAGTACATTTAAGCCTAAAACAGCTCAAATGCTAGTA |
| K242/245R     | CAGAGGGAGGCAGAGCGGAAGATCACCCCGGAG                                |
| K262R         | GACAACAACAGTAAATTTGCTAGGAGCCGAGGGCG                              |
| K242/245Q     | CCAGAGGGAGGCCAGAGCGGACAGTCACCCCGGAGA                             |
| K262Q         | GGACAACAACAGTAAATTTGCTCAGAGCCGAGGGC                              |
| S150A         | GCCGCGCAAGACCCGCGGCGCGCCGCAACGC                                  |
| S181A         | AGAGGCTCACCTGGCGCAGATCTACGAG                                     |
| S246A         | GGAGGCAAGAGCGGAAAAGCACCCCGGAG                                    |
| S319/322/326A | GAACCAGCTCAAATGCTGCTACCATCGCTGGGAGACTTGCTCCCATCATGACAGAG         |

**Table S2.** Quantitative RT-PCR primers

| Transcripts     | Forward primer (5'-3')     | Reverse primer (5'-3')    |
|-----------------|----------------------------|---------------------------|
| <i>Rag1</i>     | CATTCTAGCACTCTGGCCGG       | TCATCGGGTGCAGAAGTCAA      |
| <i>Rag2</i>     | TTAATTCCTGGCTTGGCCG        | TTCCTGCTTGTGGATGTGAAAT    |
| <i>Aicda</i>    | GCCACCTTCGCAACAAGTCT       | CCGGGCACAGTCATAGCAC       |
| <i>Efh1</i>     | CGGACTCCGAACTGAACCTC       | AACTCCGGGAACTCGGTGTA      |
| <i>Ccdc135</i>  | AGGCGACTTAAGGAAGAGGAAG     | AGTCAGAGGGTTCGATGAAGAAG   |
| <i>Sema6d</i>   | GAGAATCCAATCAGATGGTCCAC    | CATGTCACGGTAGCAGTACAC     |
| <i>Cd36</i>     | GGGAAGACAATCAAAGGGAAGTTGTC | TGCTGTCTTTGCCACGTCATCTG   |
| <i>Bank1</i>    | ATCTGTTCCAGGTTGGCCTAGCA    | AGAGCCCATTCCTCAGCATCTTCT  |
| <i>Cd74</i>     | AGTGCGACGAGAACGTAAC        | CGTTGGGGAACACACACCA       |
| <i>Mapkapk2</i> | CGGCGAGGCCATCCAGTACCT      | CCCAGGACTTCCGGAGCCACAT    |
| <i>Mapkapk3</i> | GAACCCAAGAAGTACGCGGT       | GGCTGTCATACAGGAGCTTCA     |
| <i>Hprt</i>     | CTGGTGAAAAGGACCTCTCG       | TGAAGTACTCATTATAGTCAAGGCA |
